# Supplementary material for: Impaired Fasting Glucose and Risk of Cardiovascular Disease in Korean Men and Women: The Korean Heart Study
Source: PubMed Central journal article supplement — Diabetes Care. 2013 Jan 17;36(2):328–35. doi: 10.2337/dc12-0587 (PMC3554281; doi:10.2337/dc12-0587), 2013-01-17
Supplement: supp_dc12-0587v120587_DC120587SupplementaryData.pdf [file supp_dc12-0587v120587_DC120587SupplementaryData.pdf]

SUPPLEMENTARY DATA

**Supplementary Table 1.** Incidence rate and hazard ratio (95%CI) of cardiovascular disease according to status of glucose metabolism for men and women

| FSG (mg/dL)                   | Person-years (PY) | Cases, n | Incidence rate / 100,000 PY | Age-adjusted (N=384,795) | MV-adjusted (N=381,110) |
|-------------------------------|-------------------|----------|-----------------------------|--------------------------|-------------------------|
| <b>Cardiovascular disease</b> |                   |          |                             |                          |                         |
| < 80                          | 464,843           | 2,536    | 545.6                       | 1.0                      | 1.0                     |
| 80 to 89                      | 1,139,907         | 7,971    | 699.3                       | 1.05(1.00-1.09)          | 0.99(0.95-1.04)         |
| 90 to 99                      | 1,145,284         | 9,956    | 869.3                       | 1.14(1.09-1.19)          | 1.00(0.96-1.05)         |
| 100 to 109                    | 471,013           | 5,107    | 1,084.3                     | 1.26(1.20-1.32)          | 1.02(0.97-1.07)         |
| 110 to 119                    | 132,835           | 1,806    | 1,359.6                     | 1.37(1.29-1.45)          | 1.03(0.96-1.09)         |
| 120 to 125                    | 33,822            | 554      | 1,638.0                     | 1.55(1.42-1.70)          | 1.14(1.04-1.26)         |
| >125                          | 247,025           | 5,443    | 2,203.4                     | 1.96(1.87-2.06)          | 1.49(1.42-1.57)         |
| <b>Ischemic heart disease</b> |                   |          |                             |                          |                         |
| < 80                          | 472,335           | 814      | 172.3                       | 1.0                      | 1.0                     |
| 80 to 89                      | 1,164,102         | 2,583    | 221.9                       | 1.10(1.01-1.19)          | 1.04(0.96-1.12)         |
| 90 to 99                      | 1,176,586         | 3,253    | 276.5                       | 1.19(1.10-1.28)          | 1.06(0.98-1.14)         |
| 100 to 109                    | 486,835           | 1,712    | 351.7                       | 1.32(1.22-1.44)          | 1.11(1.02-1.21)         |
| 110 to 119                    | 138,617           | 610      | 440.1                       | 1.42(1.28-1.58)          | 1.13(1.02-1.26)         |
| 120 to 125                    | 35,510            | 191      | 537.9                       | 1.64(1.40-1.92)          | 1.28(1.09-1.51)         |
| >125                          | 263,667           | 2,018    | 765.4                       | 2.20(2.02-2.39)          | 1.77(1.63-1.93)         |
| <b>Stroke</b>                 |                   |          |                             |                          |                         |
| < 80                          | 473,827           | 588      | 124.1                       | 1.0                      | 1.0                     |
| 80 to 89                      | 1,168,189         | 1,882    | 161.1                       | 1.02(0.93-1.12)          | 1.00(0.91-1.09)         |
| 90 to 99                      | 1,182,160         | 2,349    | 198.7                       | 1.08(0.98-1.18)          | 1.00(0.91-1.10)         |
| 100 to 109                    | 489,940           | 1,205    | 245.9                       | 1.17(1.06-1.29)          | 1.02(0.92-1.12)         |
| 110 to 119                    | 139,528           | 431      | 308.9                       | 1.24(1.10-1.41)          | 1.04(0.92-1.18)         |
| 120 to 125                    | 35,857            | 146      | 407.2                       | 1.53(1.27-1.83)          | 1.25(1.04-1.50)         |
| >125                          | 267,085           | 1,488    | 557.1                       | 1.93(1.75-2.13)          | 1.60(1.45-1.77)         |

SUPPLEMENTARY DATA

| <b>Ischemic stroke</b>    |           |      |       |                 |                 |
|---------------------------|-----------|------|-------|-----------------|-----------------|
| < 80                      | 475,044   | 298  | 62.7  | 1.0             | 1.0             |
| 80 to 89                  | 1,172,289 | 943  | 80.4  | 0.98(0.86-1.12) | 0.95(0.83-1.09) |
| 90 to 99                  | 1,187,275 | 1216 | 102.4 | 1.04(0.92-1.18) | 0.96(0.84-1.09) |
| 100 to 109                | 492,472   | 648  | 131.6 | 1.15(1.00-1.32) | 0.98(0.85-1.13) |
| 110 to 119                | 140,332   | 258  | 183.8 | 1.33(1.13-1.57) | 1.09(0.92-1.30) |
| 120 to 125                | 36,107    | 89   | 246.5 | 1.65(1.30-2.09) | 1.29(1.01-1.65) |
| >125                      | 269,404   | 954  | 354.1 | 2.17(1.90-2.48) | 1.78(1.56-2.04) |
| <b>Hemorrhagic stroke</b> |           |      |       |                 |                 |
| < 80                      | 475,748   | 175  | 36.8  | 1.0             | 1.0             |
| 80 to 89                  | 1,175,280 | 468  | 39.8  | 0.91(0.76-1.08) | 0.91(0.76-1.08) |
| 90 to 99                  | 1,190,937 | 598  | 50.2  | 1.01(0.85-1.19) | 0.96(0.81-1.14) |
| 100 to 109                | 494,557   | 306  | 61.9  | 1.11(0.92-1.34) | 0.99(0.82-1.20) |
| 110 to 119                | 141,222   | 109  | 77.2  | 1.20(0.95-1.53) | 1.02(0.80-1.31) |
| 120 to 125                | 36,411    | 26   | 71.4  | 1.05(0.69-1.59) | 0.91(0.60-1.38) |
| >125                      | 273,004   | 293  | 107.3 | 1.48(1.22-1.80) | 1.27(1.04-1.54) |

\*MV-adjusted covariates: age, systolic blood pressure, anti-hypertensive medication, LDL-cholesterol, HDL-cholesterol, current smoking, body mass index, and family history of cardiovascular disease  
 FSG, fasting serum glucose

SUPPLEMENTARY DATA

**Supplementary Table 2.** Incidence rate and hazard ratio (95%CI) of cardiovascular disease according to status of glucose metabolism for men

| FSG (mg/dL)                   | Person-years (PY) | Cases, n | Incidence rate / 100,000 PY | Age-adjusted (N=232,764) | MV-adjusted (N=232,764) |
|-------------------------------|-------------------|----------|-----------------------------|--------------------------|-------------------------|
| <b>Cardiovascular disease</b> |                   |          |                             |                          |                         |
| < 80                          | 287,386           | 1,577    | 548.7                       | 1.0                      | 1.0                     |
| 80 to 89                      | 620,156           | 4,316    | 696.0                       | 1.03(0.98-1.10)          | 0.98(0.92-1.04)         |
| 90 to 99                      | 679,256           | 5,765    | 848.7                       | 1.13(1.07-1.20)          | 1.01(0.95-1.07)         |
| 100 to 109                    | 319,255           | 3,209    | 1,005.2                     | 1.22(1.15-1.29)          | 1.01(0.95-1.07)         |
| 110 to 119                    | 93,696            | 1,249    | 1,333.0                     | 1.40(1.30-1.51)          | 1.10(1.02-1.18)         |
| 120 to 125                    | 24,465            | 362      | 1,479.7                     | 1.48(1.32-1.65)          | 1.11(0.99-1.25)         |
| >125                          | 169,987           | 3,615    | 2,126.6                     | 1.93(1.82-2.05)          | 1.51(1.42-1.61)         |
| <b>Ischemic heart disease</b> |                   |          |                             |                          |                         |
| < 80                          | 291,646           | 569      | 195.1                       | 1.0                      | 1.0                     |
| 80 to 89                      | 631,553           | 1,595    | 252.6                       | 1.08(0.99-1.19)          | 1.02(0.92-1.12)         |
| 90 to 99                      | 695,479           | 2,113    | 303.8                       | 1.18(1.07-1.29)          | 1.06(0.96-1.16)         |
| 100 to 109                    | 328,417           | 1,186    | 361.1                       | 1.28(1.15-1.41)          | 1.10(0.99-1.21)         |
| 110 to 119                    | 97,459            | 467      | 479.2                       | 1.47(1.30-1.67)          | 1.21(1.07-1.38)         |
| 120 to 125                    | 25,490            | 137      | 537.5                       | 1.57(1.30-1.90)          | 1.26(1.04-1.53)         |
| >125                          | 180,209           | 1,456    | 808.0                       | 2.16(1.96-2.39)          | 1.77(1.60-1.96)         |
| <b>Stroke</b>                 |                   |          |                             |                          |                         |
| < 80                          | 292,884           | 353      | 120.5                       | 1.0                      | 1.0                     |
| 80 to 89                      | 634,937           | 963      | 151.7                       | 0.99(0.87-1.12)          | 0.97(0.85-1.09)         |
| 90 to 99                      | 700,097           | 1,334    | 190.5                       | 1.09(0.97-1.22)          | 1.03(0.91-1.16)         |
| 100 to 109                    | 331,090           | 739      | 223.2                       | 1.14(1.00-1.29)          | 1.01(0.89-1.15)         |
| 110 to 119                    | 98,265            | 311      | 316.5                       | 1.36(1.16-1.58)          | 1.17(1.00-1.37)         |
| 120 to 125                    | 25,867            | 82       | 317.0                       | 1.27(1.00-1.62)          | 1.07(0.83-1.36)         |
| >125                          | 182,951           | 996      | 544.4                       | 1.96(1.73-2.21)          | 1.67(1.47-1.89)         |

SUPPLEMENTARY DATA

| <b>Ischemic stroke</b>    |         |     |       |                 |                 |
|---------------------------|---------|-----|-------|-----------------|-----------------|
| < 80                      | 293,550 | 192 | 65.4  | 1.0             | 1.0             |
| 80 to 89                  | 636,863 | 500 | 78.5  | 0.91(0.77-1.08) | 0.90(0.76-1.06) |
| 90 to 99                  | 702,718 | 710 | 101.0 | 1.02(0.87-1.20) | 0.97(0.83-1.14) |
| 100 to 109                | 332,544 | 410 | 123.3 | 1.10(0.92-1.30) | 0.98(0.82-1.16) |
| 110 to 119                | 98,839  | 186 | 188.2 | 1.38(1.13-1.70) | 1.19(0.97-1.47) |
| 120 to 125                | 25,997  | 52  | 200.0 | 1.37(1.00-1.86) | 1.12(0.81-1.53) |
| >125                      | 184,560 | 628 | 340.3 | 2.05(1.74-2.42) | 1.77(1.50-2.09) |
| <b>Hemorrhagic stroke</b> |         |     |       |                 |                 |
| < 80                      | 294,016 | 108 | 36.7  | 1.0             | 1.0             |
| 80 to 89                  | 638,541 | 229 | 35.9  | 0.82(0.66-1.04) | 0.82(0.65-1.04) |
| 90 to 99                  | 704,877 | 348 | 49.4  | 1.03(0.83-1.27) | 0.98(0.79-1.22) |
| 100 to 109                | 333,840 | 192 | 57.5  | 1.09(0.86-1.39) | 0.97(0.76-1.23) |
| 110 to 119                | 99,457  | 86  | 86.5  | 1.43(1.07-1.90) | 1.20(0.89-1.60) |
| 120 to 125                | 26,202  | 13  | 49.6  | 0.78(0.44-1.38) | 0.67(0.38-1.20) |
| >125                      | 186,811 | 205 | 109.7 | 1.58(1.24-2.00) | 1.35(1.05-1.72) |

\*MV-adjusted covariates (model 1): Age, systolic blood pressure, anti-hypertensive medication, LDL-cholesterol, HDL-cholesterol, current smoking, body mass index, and family history of cardiovascular disease  
**FSG**, fasting serum glucose

SUPPLEMENTARY DATA

**Supplementary Table 3.** Incidence rate and hazard ratio (95%CI) of cardiovascular disease according to status of glucose metabolism for women

| FSG (mg/dL)                   | Person-years (PY) | Cases, n | Incidence rate / 100,000 PY | Age-adjusted (N=149,182) | MV-adjusted (Model 1) (N=149,182) | MV-adjusted (Model 2) (N=148,346) |
|-------------------------------|-------------------|----------|-----------------------------|--------------------------|-----------------------------------|-----------------------------------|
| <b>Cardiovascular disease</b> |                   |          |                             |                          |                                   |                                   |
| < 80                          | 177,458           | 959      | 540.4                       | 1.0                      | 1.0                               | 1.0                               |
| 80 to 89                      | 519,751           | 3,655    | 703.2                       | 1.07(0.99-1.15)          | 1.00(0.93-1.08)                   | 1.01(0.94-1.08)                   |
| 90 to 99                      | 466,028           | 4,191    | 899.3                       | 1.14(1.06-1.23)          | 0.98(0.92-1.06)                   | 0.99(0.92-1.06)                   |
| 100 to 109                    | 151,758           | 1,898    | 1,250.7                     | 1.32(1.22-1.43)          | 1.03(0.95-1.12)                   | 1.03(0.95-1.12)                   |
| 110 to 119                    | 39,139            | 557      | 1,423.1                     | 1.28(1.15-1.42)          | 0.89(0.80-1.00)                   | 0.89(0.80-1.00)                   |
| 120 to 125                    | 9,357             | 192      | 2,051.9                     | 1.71(1.46-1.99)          | 1.20(1.02-1.40)                   | 1.18(1.01-1.38)                   |
| >125                          | 77,038            | 1,828    | 2,372.8                     | 2.01(1.85-2.17)          | 1.44(1.33-1.56)                   | 1.38(1.27-1.50)                   |
| <b>Ischemic heart disease</b> |                   |          |                             |                          |                                   |                                   |
| < 80                          | 180,689           | 245      | 135.6                       | 1.0                      | 1.0                               | 1.0                               |
| 80 to 89                      | 532,549           | 988      | 185.5                       | 1.13(0.98-1.30)          | 1.06(0.92-1.22)                   | 1.07(0.93-1.24)                   |
| 90 to 99                      | 481,107           | 1,140    | 237.0                       | 1.21(1.06-1.39)          | 1.06(0.92-1.22)                   | 1.08(0.94-1.24)                   |
| 100 to 109                    | 158,418           | 526      | 332.0                       | 1.42(1.21-1.65)          | 1.15(0.98-1.34)                   | 1.15(0.98-1.34)                   |
| 110 to 119                    | 41,158            | 143      | 347.4                       | 1.26(1.03-1.55)          | 0.94(0.76-1.16)                   | 0.94(0.76-1.16)                   |
| 120 to 125                    | 10,021            | 54       | 538.9                       | 1.83(1.36-2.45)          | 1.34(1.00-1.81)                   | 1.30(0.96-1.76)                   |
| >125                          | 83,458            | 562      | 673.4                       | 2.29(1.97-2.67)          | 1.76(1.51-2.06)                   | 1.61(1.37-1.88)                   |
| <b>Stroke</b>                 |                   |          |                             |                          |                                   |                                   |
| < 80                          | 180,943           | 235      | 129.9                       | 1.0                      | 1.0                               | 1.0                               |
| 80 to 89                      | 533,252           | 919      | 172.3                       | 1.07(0.92-1.23)          | 1.02(0.88-1.18)                   | 1.02(0.88-1.18)                   |
| 90 to 99                      | 482,063           | 1,015    | 210.6                       | 1.07(0.92-1.23)          | 0.96(0.83-1.11)                   | 0.96(0.83-1.11)                   |
| 100 to 109                    | 158,849           | 466      | 293.4                       | 1.22(1.04-1.42)          | 1.01(0.86-1.19)                   | 1.02(0.86-1.19)                   |
| 110 to 119                    | 41,263            | 120      | 290.8                       | 1.01(0.81-1.26)          | 0.80(0.64-1.00)                   | 0.80(0.64-1.00)                   |
| 120 to 125                    | 9,990             | 64       | 640.7                       | 1.01(0.81-1.26)          | 1.57(1.18-2.08)                   | 1.55(1.17-2.06)                   |
| >125                          | 84,134            | 492      | 584.8                       | 2.04(1.54-2.69)          | 1.46(1.24-1.72)                   | 1.43(1.21-1.68)                   |

SUPPLEMENTARY DATA

| <b>Ischemic stroke</b>    |         |     |       |                 |                 |                 |
|---------------------------|---------|-----|-------|-----------------|-----------------|-----------------|
| < 80                      | 181,495 | 106 | 58.4  | 1.0             | 1.0             | 1.0             |
| 80 to 89                  | 535,426 | 443 | 82.7  | 1.09(0.88-1.35) | 1.02(0.83-1.27) | 1.03(0.83-1.27) |
| 90 to 99                  | 484,558 | 506 | 104.4 | 1.09(0.88-1.34) | 0.95(0.77-1.18) | 0.95(0.77-1.18) |
| 100 to 109                | 159,928 | 238 | 148.8 | 1.23(0.98-1.55) | 0.98(0.78-1.24) | 0.99(0.78-1.25) |
| 110 to 119                | 41,493  | 72  | 173.5 | 1.18(0.88-1.60) | 0.89(0.66-1.21) | 0.90(0.66-1.22) |
| 120 to 125                | 10,110  | 37  | 366.0 | 2.25(1.55-3.28) | 1.64(1.12-2.41) | 1.62(1.11-2.38) |
| >125                      | 84,844  | 326 | 384.2 | 2.39(1.91-2.98) | 1.78(1.42-2.24) | 1.73(1.38-2.17) |
| <b>Hemorrhagic stroke</b> |         |     |       |                 |                 |                 |
| < 80                      | 181,732 | 67  | 36.9  | 1.0             | 1.0             | 1.0             |
| 80 to 89                  | 536,739 | 239 | 44.5  | 1.01(0.77-1.32) | 1.00(0.76-1.32) | 1.01(0.76-1.32) |
| 90 to 99                  | 486,059 | 250 | 51.4  | 0.98(0.75-1.29) | 0.92(0.70-1.22) | 0.93(0.70-1.22) |
| 100 to 109                | 160,717 | 114 | 70.9  | 1.13(0.83-1.53) | 1.02(0.74-1.39) | 1.02(0.75-1.39) |
| 110 to 119                | 41,764  | 23  | 55.1  | 0.75(0.47-1.21) | 0.64(0.40-1.04) | 0.64(0.40-1.04) |
| 120 to 125                | 10,210  | 13  | 127.3 | 1.61(0.89-2.93) | 1.35(0.74-2.46) | 1.35(0.74-2.46) |
| >125                      | 86,193  | 88  | 102.1 | 1.30(0.94-1.80) | 1.09(0.78-1.53) | 1.09(0.78-1.52) |

\*MV-adjusted covariates (model 1): Age, systolic blood pressure, anti-hypertensive medication, LDL-cholesterol, HDL-cholesterol, current smoking, body mass index, and family history of cardiovascular disease

\*MV-adjusted covariates (model 2): Age, systolic blood pressure, anti-hypertensive medication, LDL-cholesterol, HDL-cholesterol, current smoking, body mass index, family history of cardiovascular disease, and menopause status
